# Supplementary material
Source: Springer Nature journal article supplement (https://www.springermedizin.de/resource/supplementary/13058_2014_3424_MOESM5_ESM.pdf/9704150)

(A)

SUM159

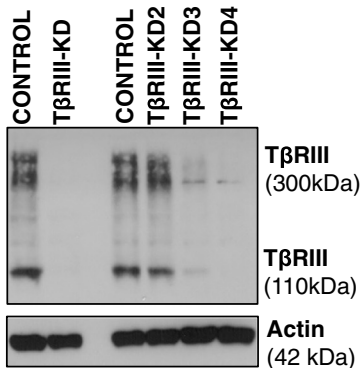

(B)

SUM159

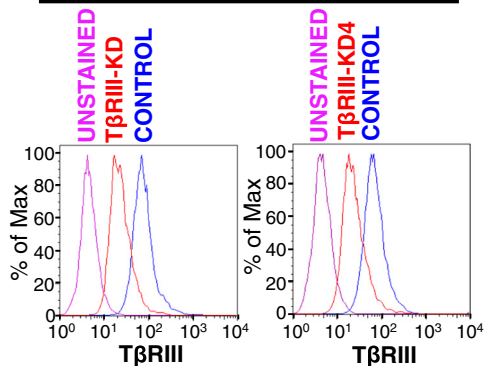

(C)

MDA-MB-231 MDA-MB-157

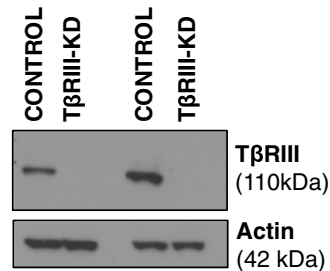

(D)

SUM159

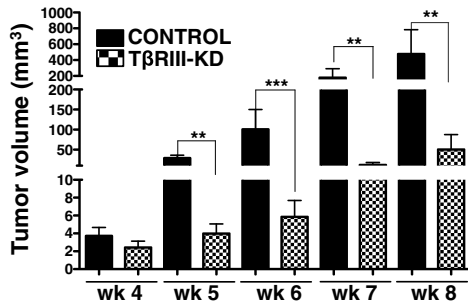

(E)

MDA-MB-231

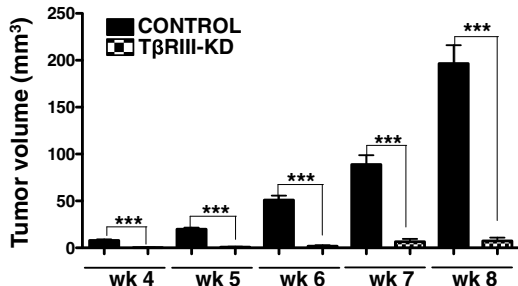

Supplement: MOESM5 [file 9704150]
